# Supplementary material for: Machine Learning Models for Nocturnal Hypoglycemia Prediction in Hospitalized Patients with Type 1 Diabetes
Source: MDPI journal article supplement (doi:10.3390/jpm12081262), 2022-07-31
Supplement: s1 [file s1]

**Table S1.** Clinical and laboratory parameters included in the ML models.

|    | Parameter                              | Units/Variant                          |
|----|----------------------------------------|----------------------------------------|
| 1  | Age                                    | years                                  |
| 2  | Sex                                    | man/woman                              |
| 3  | BMI                                    | kg/m <sup>2</sup>                      |
| 4  | Diabetes duration                      | years                                  |
| 5  | Severe hypoglycemia in medical history | no/yes                                 |
| 6  | Impaired awareness of hypoglycemia     | no/yes                                 |
| 7  | Target HbA1c                           | %                                      |
| 8  | Insulin dose                           | IU*kg <sup>-1</sup> *day <sup>-1</sup> |
| 9  | Basal insulin dose                     | IU*kg <sup>-1</sup> *day <sup>-1</sup> |
| 10 | CKD, stage                             | C0-C4                                  |
| 11 | Diabetic neuropathy, autonomic         | no/yes                                 |
| 12 | Dislipidemia                           | no/yes                                 |
| 13 | Obesity                                | no/yes                                 |
| 14 | Arterial hypertension                  | no/yes                                 |
| 15 | Antihypertensive therapy               | no/yes                                 |
| 16 | Heart failure                          | no/yes                                 |
| 17 | Heart failure, class                   | 0-4                                    |
| 18 | Current smoking                        | no/yes                                 |
| 19 | HbA1c                                  | %                                      |
| 20 | eGFR                                   | mL/min/1.73 m <sup>2</sup>             |
| 21 | Albuminuria                            | mg/day                                 |
| 22 | UACR                                   | mg/mmol                                |
| 23 | Proteinuria                            | mg/day                                 |

BMI, body mass index; CKD, chronic kidney disease; eGFR, estimated glomerular filtration rate; HbA1c, glycated hemoglobin A1c; UACR, urinary albumin-to-creatinine ratio.
